# Supplementary material for: Evaluating the effect of two-dimensional molecular layout on DNA origami-based transporters
Source: Royal Society of Chemistry journal article supplement (doi:10.1039/d3na00088e), 2023-01-01
Supplement: d3na00088e4.pdf [file d3na00088e4.pdf]

### Supplementary Table 1

Rod1 for Fig. 2 (one binding site, see Supplementary table 3 for the sequence of anchoring site) ("F" in the staple name indicates the place of Fluorophore (Cy5), and "5L" indicates the place of BG at 5' end)

| #  | Name        | Sequence ("t" denote the polyT to prevent the DNA origami aggregation) |
|----|-------------|------------------------------------------------------------------------|
| 1  | Rod_001_4T2 | ttttGGGCGATGGCCGTCTATCAtttt                                            |
| 2  | Rod_002     | CCAACGTTTTCTGGATCCCCGGGTACCTTCGCGTCTGAGGCTTGCA                         |
| 3  | Rod_003     | AAAGAACGTGGACTCAAATCAAGTTTTTAATAACAGAACAATCAGTTGG                      |
| 4  | Rod_004     | CACTATTCCGCTCAGCCTGCAGGTGCACGCCAGCTTTCATCA                             |
| 5  | Rod_005_4T  | ttttGTAATCATGGTCATAGCTGCAAAGGGCGCCACC                                  |
| 6  | Rod_006     | AGGAATCGGTTAAATCATCCTGTATCTAGAGTGTGAAATTGTTAT                          |
| 7  | Rod_007_4T2 | ttttCATCAAAAATAAGAGCTCGAATTCtttt                                       |
| 8  | Rod_008     | CTGGCCTGCTCATTTTTTTAACAGAGCATCAAATCA                                   |
| 9  | Rod_009_4T2 | ttttCAATAAAGCCTCCAATAGGAACGCtttt                                       |
| 10 | Rod_010_4T  | AAAGCTACAAGGCAAAGAATTTTATAGTAAAAATCAGGTCTTTAAtttt                      |
| 11 | Rod_011_4T2 | ttttCCCTGACTAAGCAAAATTAAGtttt                                          |
| 12 | Rod_012_5L  | TCGCATTAATTTTTGTTGTACCAAAAACATACATCCAATAAATCATAC                       |
| 13 | Rod_013     | ATTGCATAAACGAGAATGACCATAAATCCAGAAGCAAAGCGG                             |
| 14 | Rod_014_4T2 | ttttCATTCAAGTGAATAAGGACGTAACAAAGCTGCTtttt                              |
| 15 | Rod_015     | CTTGCCCCGCAATAGAGGCGTGGCTTATCCGGTATTC                                  |
| 16 | Rod_016     | TGACGAGAAACACCGGATATTTGCGGGAGATATAT                                    |
| 17 | Rod_017     | GTAGTAAGTTCAGACAAAAAGATTAAGAAGCATTATATGACCAAAT                         |
| 18 | Rod_018     | CACCGGACCGCTTTCATTACC                                                  |
| 19 | Rod_019_4T2 | ttttGGGAGTTAAAGGACCAGAGGCATGATACACCGGAATCAtttt                         |
| 20 | Rod_020     | TCGTCACTTCATAAACGCAGTTAAGGCGATCATATGCGTTAT                             |
| 21 | Rod_021     | CCTCAGCTCTTGACAAGAACCAGAACGAACCAGAACGACTTG                             |
| 22 | Rod_022     | TTTAGGACAAATCAACAGTTGGCTGGTACTCAGGACTCAGAATCGGTGCG                     |
| 23 | Rod_023     | AATCAATATCTGGTATTACCGCGGAATAGCCACCAGCCCACGCATAACC                      |
| 24 | Rod_024_4T2 | ttttCCTCAGAACCAGAAAACCCACTACGTGAACAGAAGAAGTCAAtttt                     |
| 25 | Rod_025     | CCGCCACCCTCAGAGGTGTATCCACCCTTTGAATA                                    |
| 26 | Rod_026_4T2 | ttttCCGCCTCCCTCATACCGCCACtttt                                          |
| 27 | Rod_027_4T  | GGTTTAGGAGCCGCCGCGCAGAGGCGtttt                                         |
| 28 | Rod_028     | GGAAACCCCTTATTTCAAATAGAACCGCACCGTA                                     |
| 29 | Rod_029     | GAAGGTTATCTAAAATATCACAAAATCACCCCTC                                     |
| 30 | Rod_030_4T2 | ttttCCAAAAGAAGTCCACCACCGGAAtttt                                        |
| 31 | Rod_031     | GCACTAACAACTAAGATTGCTCAGAGCCCCATCTT                                    |
| 32 | Rod_032_4T2 | ttttTAAGAACGCATAACGGAATACTtttt                                         |
| 33 | Rod_033_4T  | ttttAATTATTCATTTCAATTACAGAATAATAAGACTGAGGAAA                           |
| 34 | Rod_034     | AAAGAAGATGATGATGATAAAATGTTAGCAAAGTT                                    |
| 35 | Rod_035     | TAATTAAGTAAAAAGCCTTATAGAATTTAGCGAACCTCC                                |
| 36 | Rod_036     | CCAATACGGGAGGTTTTGAAAGCCGAACAAACGTGCGTTTTG                             |
| 37 | Rod_037     | CCTAATTTACGAGCTACCGACGGTTATTAATTAAGAACCTATCATTT                        |
| 38 | Rod_038     | GCAAGCAAATCAGAGTTTAGTTTAAATACTGAGCACCAAGTT                             |
| 39 | Rod_039_4T2 | ttttACTATCGGCCTTAAAGGAATTGAGtttt                                       |
| 40 | Rod_040     | ATATCCATCACTTGCCTGAGTCATCACC                                           |
| 41 | Rod_041     | ACCACCCTATAGCCCCAGCCACTTCTTTGATTAGTTGGGGTC                             |
| 42 | Rod_042     | AAGAGTCGAGGTGCCGTAAAGAGCAATATTGCAAC                                    |
| 43 | Rod_043     | ACATTAACCTTGCATCAATTCCACACAACCTTGAAC                                   |
| 44 | Rod_044     | TAGGCTGGAGGGTAAGTTGCGAGCCCAAAGTGTTGTTCCAGT                             |
| 45 | Rod_045     | ACGCAACCCGAAAACGACCGGAAGCATAAAGAGGGTTG                                 |
| 46 | Rod_046     | CCGAGATTGTAAGAGTCACGACGTTGTTCCGATTTACCGAT                              |
| 47 | Rod_047     | ATACGAGCGGCCAGTGCCAAGATGTGAGTGACAACGACAGCA                             |
| 48 | Rod_048     | CCGACAACGAGTAATTAATTTTTGTTACTGTAAT                                     |
| 49 | Rod_049     | GGTTTAACCCCTCCGAAAGACTTCAAATCAATTCGGGAGAAGCCTTT                        |

|     |         |                                                    |
|-----|---------|----------------------------------------------------|
| 50  | Rod_050 | AGCTTGACTCCGTGCAAATATTTAAATTGTAA                   |
| 51  | Rod_051 | CTACAGAACAGACCATTTCAAGCTGAAAAGGTGGC                |
| 52  | Rod_052 | TCGGAACGCTGACCACTTTTGTACTAATAGTAGTGGAAGCC          |
| 53  | Rod_053 | TATCGCGAATATTCATTGAATTTTCAAC                       |
| 54  | Rod_054 | AAATGCTTTAAACAATTGGGCAGAGTAAAGCGAAAAACCATC         |
| 55  | Rod_055 | TTCATCATTGAGATAGCAGATGCCTTAA                       |
| 56  | Rod_056 | AGGCGCATTTAATCAAGCCCTCTATTTTCCGTTTTTATTTTCGCCAACG  |
| 57  | Rod_057 | GCAACGGGGCATTGCAACATGACCTACTCAACAGTAGGGCAAGCAAG    |
| 58  | Rod_058 | CCCTCATTTTCAGGATATAAGTCAGAGCTAACGGA                |
| 59  | Rod_059 | AACCTCAAATATCAAGGAAAAAGGGTTGGATAGCA                |
| 60  | Rod_060 | TAGGAACTAAGTGCCACCAGCTTTTACACATTTAACAAATTCATCTTC   |
| 61  | Rod_061 | ATCTAAAGCATCACACCTACAAGGCGGACCATGTA                |
| 62  | Rod_062 | AGAACCACGTGAGACGCTCAAATTAACCGTTGTCACTAAA           |
| 63  | Rod_063 | CTTATTAAGAAAATAAATACCCTTACCAGTATAAA                |
| 64  | Rod_064 | AACCCTCGAGCCGTCAATAGAGAAACAACGCCACCTAGCCCC         |
| 65  | Rod_065 | ATCGTAGATCAAGATTAGTTGTTTTAAGTAAAGGTTTCGGTCA        |
| 66  | Rod_066 | CTTGCTGTTTGAGGATTTAGAACAGTACAGCCGCCTTTCATC         |
| 67  | Rod_067 | TATAAACTTACCGATTGTGACGTCATTTTTAATTCGAGCTGGCGCGA    |
| 68  | Rod_068 | ATCAAGAAAACAATGGTTTGACATACAAAAGTA                  |
| 69  | Rod_069 | GCACCAGCTACAATAGCTATGAAACGCAGCGCGT                 |
| 70  | Rod_070 | GAATCATTACCGCGACAAATTGACCGTGAACAACTTCGCCTTAGATTA   |
| 71  | Rod_071 | AATTTAAATTAATTATCGGGATAATACA                       |
| 72  | Rod_072 | TCGGAACCCTAAAGATCACGCTGGAAAT                       |
| 73  | Rod_073 | GCCAGCACAGTACCTTTTGACAAAAGAGTCTGTCCGGAGCCC         |
| 74  | Rod_074 | GAATAGCCCGATTTAGAGCTTACCGAGTGCTCAAT                |
| 75  | Rod_075 | CGCAAGGGTATAAGGGAACAATTTTCCCCCTGGGGTGCCTAAATCAAAA  |
| 76  | Rod_076 | ACTTTGATTTTCATGGCTTGCTCCAGTACAAAATCCCTTATAA        |
| 77  | Rod_077 | CCAGTAATGGTTAAGTTGCTAACTCACATTAATCGGC              |
| 78  | Rod_078 | GTTCCGAATTGCGTGTGCTGCAAGGCGAGATAGGT                |
| 79  | Rod_079 | TGAGTGAGGGTAACGCCAGGGACGGCGGTGAATTT                |
| 80  | Rod_080 | TTCGAGGATTGACCAAAACAGGAAGATTATAAAAA                |
| 81  | Rod_081 | GTATCGGCACGTTGTTGATAATCAGAAAAGCC                   |
| 82  | Rod_082 | TTTTAAGTAGCGTCGAACCAGACCGGAATTTAGCTAACCTCATATATT   |
| 83  | Rod_083 | TTAAATGTGGTCAATAACCTGGCAAATATGTTTAGACTGGAACTGGC    |
| 84  | Rod_084 | AAGACTTAAGAGGATTTTTAGATATTTTCATTTGGTCAAAGC         |
| 85  | Rod_085 | CAATACTGCGGAATATTACCTACGGTGTGGCTTTGCTTAAACCCGTAAC  |
| 86  | Rod_086 | CAGATGATATGCGAATAGCAATTTTATC                       |
| 87  | Rod_087 | CTGACCATCATTATATAAGAGCGCTAAC                       |
| 88  | Rod_088 | ACTCGTATTAATCTTGCGTAATTGGCCCGACAGATTCCATTAACCGAA   |
| 89  | Rod_089 | AGGACTAAGACTGTAAAGACAATTTTAGAGAATCGCCATATT         |
| 90  | Rod_090 | TTTATCAAGGAAGTATCAAGTTATTTTGCAGAAAAGCCAACATGTAATT  |
| 91  | Rod_091 | ACTGAGTTTTTGTCTTGACAGATGAATA                       |
| 92  | Rod_092 | AGAGCCAGCAGCAACGTCTGAAGCGGGGTTTCGTCA               |
| 93  | Rod_093 | AAACTACGAAGGATTACAGACGGATTTTTCAGTACATAAATCAAAGAACG |
| 94  | Rod_094 | GCCTGCAACAGTGCATTGGCACTCAAGAAACGCCT                |
| 95  | Rod_095 | AGGCAGGTAGGATTAATGGATTAATCAGTGAGGCCGACGGGG         |
| 96  | Rod_096 | ATGAAAAGACTTTACAAACAACGTCAGGAGGTTGTAGCGTC          |
| 97  | Rod_097 | AGTACCGCTGAATCTTACCAACAAGAAAATAAGTTTTGCCTT         |
| 98  | Rod_098 | TCACAATCCCAATAACCAGTCTAGTAAACCAACAGGTCAGGATCGCAA   |
| 99  | Rod_099 | ATTACCTTTTTTAACAATATCCACGGACAATGAA                 |
| 100 | Rod_100 | CACTCATCGAGAACTTAATTGTTAATTTTCATTTGATACAGTAAGTATTA |
| 101 | Rod_101 | CGGGTATTAACCATAACAACACTTTTTTGGAAACAGGTTTATTTCGACA  |
| 102 | Rod_102 | CCAAGAAGAGCGTCTTTCCAGAGTTAAGCAATAGATCAGTAG         |
| 103 | Rod_103 | AAAGCCGGCGAACGGTTTTTATATTTACCACGCTG                |

|     |             |                                                   |
|-----|-------------|---------------------------------------------------|
| 104 | Rod_104     | TTGATATGAGACTCGATTACGAATCCTGAGAAGTTGGCGAG         |
| 105 | Rod_105     | GATGGTCAAAGGAAGGGAAGATACGCCACAGTCAC               |
| 106 | Rod_106     | CAATGCCACCCCGGGTGTAGAGGGGGATTGCGCTCACTGCCCCCTGTTT |
| 107 | Rod_107     | CAGCAGGCGAAAATGCTTTCCGCCAGCTGGCGAAAATGGGCGC       |
| 108 | Rod_108     | GTAAAGAACTAGCACCGTGCCTATTACAGTCGGGAAACCTGTTTGCCC  |
| 109 | Rod_109     | AAAACGATTCACGTAAAGTTTTCGGTCCACGCTGG               |
| 110 | Rod_110     | AAAGGCCTCGATGAGGGACGACGATCGGAGCTGCATTAATGAGCAGCAA |
| 111 | Rod_111     | GAGAGTTATCGGCCACTGTTGGGAAGGGCGACAGTATCGGCC        |
| 112 | Rod_112     | TCGTGCCTGCGGGCCTCTTCGTCTGCCA                      |
| 113 | Rod_113     | CTCCAAAATCGTAATGTCAATCATATGTTGAGTAA               |
| 114 | Rod_114     | TGAAAATGTTTGAGACGGTAATCGTAAATTCAAAA               |
| 115 | Rod_115     | TATGGTTACCCACAAAAAATCAAGTTTTGTACCTTTAATTGCAGTTTGA |
| 116 | Rod_116     | ACAAAAGAGCGCTAGAATAAGCGAGAGATAAGAGGTCATTATTCTGC   |
| 117 | Rod_117     | CTGGAGCAAACAAGAGAAGGAGACAGTCAAATACAGTTGATTCCCA    |
| 118 | Rod_118     | CGTAATGGCAGACGTGTGTAGCCATTAGATACATTTTAGAGA        |
| 119 | Rod_119     | CCAACCTGTTACTTGGGTGAGGAACGAGTAGATTTTCTTTT         |
| 120 | Rod_120     | TTTGCGGATGGCTTAGAGCTTCCATATACACCATCAATATGA        |
| 121 | Rod_121     | GCCAGAGGGGGTAAAGGACGTATAAGGGAAACGGGTTTAATTGTAGCAT |
| 122 | Rod_122     | GGCTTTTGCAAAAGTACGTTAACGAGGCCACTACAAAAGGTCATAGT   |
| 123 | Rod_123     | ATAAAAACCAAATCGGAACAGCTCCAT                       |
| 124 | Rod_124     | GATTGAGAACAAAGTACAGGTGACGACG                      |
| 125 | Rod_125     | GTCAATCTGGGAAGAGAATTGAGCCTAA                      |
| 126 | Rod_126     | AGCCGGAATAAAACATATCAGAATAAAC                      |
| 127 | Rod_127     | AAAAGAAGAAATCCGCGACCTACATTATTCAGAGGTCCCAAT        |
| 128 | Rod_128     | AGGAGCCTAAAATAACCGTAAAAATTCACCAATCGAGGCATTTTCGAGC |
| 129 | Rod_129     | CTCCAAAGAAGGCAAATGAAAGCCAAAGTATGTAAAGAGAATATAAAG  |
| 130 | Rod_130     | TAATTTTAAGAGGCAGCAAGGTTCAACCTTAGGTTAAAGGTAAAGTAA  |
| 131 | Rod_131     | AAAATACCGAACGACCCTTCTGCCCCCTTTCCAGCGAATAA         |
| 132 | Rod_132     | TCCACAGAGAGGCTTCAAAACAGAAATGAGTGAATAACCTTTGCAAAT  |
| 133 | Rod_133     | GAGGCGGTGAGTATACGACCAAGTATTAACAGCCC               |
| 134 | Rod_134     | TAGCGTATTCTGAATTAAGCCAAAATTTAAATCGTCGCTATATAACTA  |
| 135 | Rod_135     | AGCAGAAGATAAAAATTCTGGCCTATTAACGATCT               |
| 136 | Rod_136     | TGTCGTCTGCCTATCAGTCTCAAGGGTTTTTTCCCTTAGAATCTCCGGC |
| 137 | Rod_137     | ATCCTCAACATGAAGTAATAATTAGACAGGAACGGAAGCGAA        |
| 138 | Rod_138     | GAAAGCGTTCGGAACCAACAGAGGAGGCCGATTAAGGGCGCT        |
| 139 | Rod_139     | TAACACCCGAACGTTATTAATCGTAAAACAAATAATAGCAGC        |
| 140 | Rod_140     | CGGCTGTTTTGCCAGTTACAAAGAGATATACCAGCCCATCGA        |
| 141 | Rod_141     | CAGAGGTGTTTGAGTAACATTACCATATCAGAATGCGTCACC        |
| 142 | Rod_142     | ATGTAGAAGCCATATTATTTAGTAATTGGGCGACACCGGAAA        |
| 143 | Rod_143     | AACCACCTGCGGAACAAAGAAATAATGGTGAATTTTACCATT        |
| 144 | Rod_144     | CTTTCTTATCATTAGGCAGCAAGACATATATGTAAAGAACTTTGCC    |
| 145 | Rod_145     | AACCAATCAATAATCAGTAATATGCTGAGCTTCTGATTTGCATTTAAA  |
| 146 | Rod_146     | ATCCCATCCAAATAAGAAACGCACCCTGGGAGGGAGCACCAT        |
| 147 | Rod_147     | AGGAGCGGGCGCTAAGGGATTAAGGGAC                      |
| 148 | Rod_148     | GGCAAGTGTAGCGGGCTAAACAGATAGA                      |
| 149 | Rod_149     | ACCGTTCCAGTTAATGACCTGGAATCAGAGCGGGATCACGCT        |
| 150 | Rod_150     | CCGCCTGGCCCTGAGCGCGTAACCACCACTCGTTAAAAGCGT        |
| 151 | Rod_151     | CCCTTCAGGCGGTTATTCGCCATTACAGGGATCGCA              |
| 152 | Rod_152     | TTTGTATGACCCCGAATAGAGTATGGGCTGATTG                |
| 153 | Rod_153     | CCGTTCTGCTATCACAGCTTTAAGCGCCTGCGTATTGGGCGCGCAACAG |
| 154 | Rod_154     | GAGACGGCAGGGTGCCGGAACACAGGCACCGGCAC               |
| 155 | Rod_155_4T2 | ttttTTCACCAGTGGGCGCGTAtttt                        |
| 156 | Rod_156     | TCAGGAACTGCGCAAACGCGCGGGGAGA                      |
| 157 | Rod_157     | AAGGAACCTCCAGCGGTCATTGCCTGAGAGT                   |

|     |             |                                                                                                         |
|-----|-------------|---------------------------------------------------------------------------------------------------------|
| 158 | Rod_158_4T  | ttttAACAGTTTCAGCCGCTTCTAGAGATCTACAAAGAGCTGAT                                                            |
| 159 | Rod_159     | TATTGACGAGAATTGTTGAGATATCATAGAATATAATGCTGTACGGTGT                                                       |
| 160 | Rod_160_4T  | ttttAAACAAAGTACAAAATTAATATGCAACTAAAGT                                                                   |
| 161 | Rod_161     | CATCTTTCATCGCCTATTCAACTGGAAGTTTCATTAATTGCT                                                              |
| 162 | Rod_162     | AGCTCAAAGTAAGAGCAACACTTTAGGA                                                                            |
| 163 | Rod_163     | ATAGTGAATTTAAAAGGTGACAGGGAATTCAACGAGGCATCATGTTTTA                                                       |
| 164 | Rod_164     | ACCCTCGTTTACCAAGAAAGATTGTGTCTACACTAGGAATTGACGTTAG                                                       |
| 165 | Rod_165_4T2 | ttttCGCCAAAAGGAATTACTAATGCAGATACATAAAttt                                                                |
| 166 | Rod_166     | TGATAAATTCATCAAACCTGAAATTTTTTACAAGAA                                                                    |
| 167 | Rod_167     | ACGGAGAATACCACAGCGCATATGAAAA                                                                            |
| 168 | Rod_168_4T2 | ttttATGGCAATTCATATACAGGCCATTTGATACCAAGCGCGtttt                                                          |
| 169 | Rod_169     | AACTAAAAAACTACCAGTAAGGTA AAAACTACCTCAGACGACGACAAT<br>GGAGTGAAGCGATTGGAATTAATTCATTTCAAATATGTTTCAGCTAATGC |
| 170 | Rod_170     | AGAA                                                                                                    |
| 171 | Rod_171     | TAAATGAGTATAAACAGTAAGGATTATAAACATAGCGATAGCCTGAGAG                                                       |
| 172 | Rod_172     | TAGCCCTAAAACATAAGAATAAGTGCCCATTTTTCT                                                                    |
| 173 | Rod_173     | ATTTTGCGTGCCTTTTTGATGCAATATAAAGACGCTGAGAAGAGTCA                                                         |
| 174 | Rod_174_4T2 | ttttTAGTCTTTAATGCGCTATTTTTGGGGTCATAAACA ACTTTTctttt                                                     |
| 175 | Rod_175_4T  | ttttATAAGTTTTAACGAATGGCATGGTTGCTTTGACCGCTACA                                                            |
| 176 | Rod_176     | CATGGCTGAGTAACCGTGGCATATAACGTGCTTTCCACCCGCCGCGCTT                                                       |
| 177 | Rod_177_4T2 | ttttCACCGACTTGAGAGTGTACTGGTAtttt                                                                        |
| 178 | Rod_178     | CGCCATTGAAGGAGCGGAATTTTTGTTTGCGTACATACAAATC                                                             |
| 179 | Rod_179     | GTCCTGAGTTTAAACGTCAAATAGACGGGGAAATTGAGCCAG                                                              |
| 180 | Rod_180_4T2 | ttttAATAACATAAAAAATTATCACCGTtttt                                                                        |
| 181 | Rod_181_4T2 | ttttCGCGCCTGTTTATAGCAGCCTTTACAGAGAGtttt                                                                 |
| 182 | Rod_182     | AAATAATTTCTGTCTTTTAAACCCTTGA ACTTCTGAACCACCA                                                            |
| 183 | Rod_183     | TCAACAATAGATAAAAAACAACCATAGGTTTAGATTATCCTGAATCATCA                                                      |
| 184 | Rod_184     | AATGCGCGAGCACGCAGACAAGAACTGATATTCTGATTATCAGATG                                                          |

**Supplementary Table 2**

Rod2 for Fig. 3 & 4 (8 binding sites, see Supplementary table 3 for the sequences of anchoring sites) ("F" in the staple name indicates the place of Fluorophore (Cy5), and "5L" and "3L" indicate the place of BG-ligand at 5'- and 3'-end, respectively)

| #  | Name         | Sequence ("t" denote the polyT to prevent the DNA origami aggregation)    |
|----|--------------|---------------------------------------------------------------------------|
| 1  | Rod2_001_3T  | CTGTTCGTGCCAGCTGCGGTGCTGCGCCCACGTGCGCCTGAGCAGCAAAtttt                     |
| 2  | Rod2_002     | TGCTGAACGCCACGCTGATTCACAATGACATTGGGCGCGGGAAAC                             |
| 3  | Rod2_003     | AAACCAAATGTCGAAAGAAACAAAAGGGAGTTAAAGGCCGTTCCAGTC                          |
| 4  | Rod2_004_4T  | ACGTCAATTTGCGTAACAACCATAGGCTTGCCTACAACGGAGATTTGTAtttt                     |
| 5  | Rod3_005_4T  | ttttAAAAGAAGAAAGCGAACCAGACCCGGATAAATTATATGATACTGTAGCCATA<br>AGAAA         |
| 6  | Rod2_006     | CGAGCTTCTTTTGCCAGAGGGGGCCAAGCGCTCCGCGACGCGCCGAC                           |
| 7  | Rod3_007_4T  | ttttTCATTTCAATTATCTGAGAGCAGGTCAGACCATCAAATGCCGACCAATAG<br>GAACGCCA        |
| 8  | Rod2_008_4T  | ttttCTCCGGCTTAGGTTGCAAGTACCTTTCATCGAATCCAAAGCTTTCA                        |
| 9  | Rod2_009     | TCAACATTTTTTTTAGAGAGGGTAGCTATTTTTTTAATTGAGTACCTGACGATA<br>A               |
| 10 | Rod2_010     | TCCTTTTGAAAGGGTGTCTACAAATTAATTTTTGTTAAATCAGCTCAAATGT<br>GA                |
| 11 | Rod2_011     | CGGAGACAATTACCGCTATCAAAAACTATATGTTACAAAATCGCGC                            |
| 12 | Rod2_012_4T  | ttttAACTCCAACTACCTTGTTTTTATGCACTCATAAAATAGCAGCCTTTA                       |
| 13 | Rod2_013     | CAGAGAGTTTATCCCTAGGAATCGTCAAATCGATTAGA                                    |
| 14 | Rod3_014_4T  | CTACGTGAACCATCACCTACATTCATTGGCAGAGAGCCATAAATTGATAGCG<br>AGAGGCTtttt       |
| 15 | Rod3_015_4T2 | ttttAGAGGCGGAGGGCGAAATTATTTATTGACGCTATCTAAAGCATCACCTAG<br>AGGCGAattattttt |
| 16 | Rod2_016     | CAGGGTGGTTTTTCTCACTATTACGACCAGTCAGGAAAA                                   |
| 17 | Rod2_017     | AAAGAAGAGCAACAGTCTCAAATAACGCTCATGGAAATACCCAAATCGGACT<br>CCA               |
| 18 | Rod2_018     | CAGTCACAAAGAACGTAAGTTTTTTGGGGTTCGAGGTGCCGCATTGCAA                         |
| 19 | Rod2_019     | AGAACGGGTATTAACGGTTATATTCATAGGCCTGAGCA                                    |
| 20 | Rod2_020     | TTGAGAGAAGAAAGGCGCGAGTAATAAACAGCCATATTAATAACAT                            |
| 21 | Rod2_021     | GCGCTCACTGCCCGCTCTTTTGCCGATAGTTCTGCTCCAACCGCCT                            |
| 22 | Rod2_022     | ATATCTGGGGCGGTGAGGACATTCTTAAACAGGTGAGACGATTGCGTT                          |
| 23 | Rod2_023     | GGGATCGTACCCCGAGGATTATATAATAGTAACCAGACTTAATTGC                            |
| 24 | Rod2_024     | ATCATAACAGCCGGAACATCTTGCACCCTCA                                           |
| 25 | Rod2_025_5L  | GCAGCGAATCACATTAGGCAACAGCTGATTGCTTGAGTGAGAGATAG                           |
| 26 | Rod2_026     | AATCAGATAAGATTCAATAAGAGGCCCGAAAGAGACTGGATAGCGTCCAAAA<br>CACT              |
| 27 | Rod2_027     | AATAAAAGGTATTAAGTACTTCTCGTTTTAAATGTTTACTTCAAATATCGC<br>G                  |
| 28 | Rod2_028     | ACAACCCGTCGGATTCAATTCGCAGGCTATCA                                          |
| 29 | Rod2_029_5L  | GGTCATTGAGAGGAAGTCATTTTTGCGGATGG                                          |
| 30 | Rod2_030     | GAGTGTAACGTTAATATTTGTTAA                                                  |
| 31 | Rod2_031     | TCCGTGGGTGTAGGTAATAGAAGGATTAAGACGCAAGACATAACGGATTCCG<br>CCTGA             |
| 32 | Rod2_032     | GCAACACTAAAATTAAGAGGTGATCAGTTGGCAATATTACCGCCAGC                           |
| 33 | Rod2_033     | CGAGGCGCTGAATTTCTGGCCAACTTGTTCCATAAATCGGAACCCTAA                          |
| 34 | Rod2_034     | TAAAGCACGTTTGAACAAGAGTCTTTCACCACTTGATAC                                   |
| 35 | Rod2_035     | TGATGAAAAATACCAAGTAAATGCTGATGCAATTCCTTATAGCAAGCAGTTAC<br>AAA              |
| 36 | Rod2_036     | CAATAATCGGCTGTCTATCCAATCGCTGAGAAAAGAAAAC                                  |

|    |             |                                                                                                                  |
|----|-------------|------------------------------------------------------------------------------------------------------------------|
| 37 | Rod2_037    | AGTGAATTGCCCAATCATTCCAAAAACAGGGAAGCGCATTAGACGATTTGC<br>CA                                                        |
| 38 | Rod2_038    | TCAAACCCTCAATCATTGCTTTGCAAACATCGAGTCAAT                                                                          |
| 39 | Rod2_039    | AACAAACGTCTTTCCAGAGCCTAGGAGAATT                                                                                  |
| 40 | Rod2_040_3L | AATGAGTGAGCTAACAGACAGCATCGGA                                                                                     |
| 41 | Rod2_041    | AGGAATTGCGAACCACCTGACCTGGGTTTATCGCCTGGCCGGGTGCCT                                                                 |
| 42 | Rod2_042    | AGGGAACCCGAAAGAGAGGGTAGCAACGGCTAAAGCCTG                                                                          |
| 43 | Rod2_043    | ACGGCAAAGAATACTAATACTGCTAGTAAGA                                                                                  |
| 44 | Rod2_044    | AGAACGCGTTAAATGCCTTAATTGAAGCGGATTCATAAATATTCATTGACCTA<br>AAA                                                     |
| 45 | Rod2_045_3L | GGAATCGTGCATCAAAAAGATTACCTGAGAGTCTG                                                                              |
| 46 | Rod2_046    | GCGGATTGACCGTAATATTTAAATCAAACAAGAGAATCGAAGAAGCA                                                                  |
| 47 | Rod2_047    | AAATTTTTAATCGTAAAACAGGAAGATTGTATAAGCAAATGGGATAG                                                                  |
| 48 | Rod2_048    | ATAGCGACTTAGAGAATGCCTGAGTAATG                                                                                    |
| 49 | Rod2_049    | CATATATTAGGCGTTTAGAATCCAATATATTGTAACAGTACCTTTTA<br>CTGAATATACGCCAAATTACCTTTACCGAAAGGAAGGAACTATCGGCCTTG<br>C      |
| 50 | Rod2_050    | AGGGAGCTGGTAATAAACCTTCAGCAGAACAATCATAACGAGGCA                                                                    |
| 51 | Rod2_051    | CATCCTAATTTACGACTTTTTTATTGAAAACCTATTTGAAAGGAATT                                                                  |
| 52 | Rod2_052    | GAACTGACATTGTATCAAAGCGTATCAAAGATAGAGCTTGACGGGGA                                                                  |
| 53 | Rod2_053    | TTTCGAGGAGACGGTGATAAACTTACATTAGAAACAA                                                                            |
| 54 | Rod2_054    | CCCCGATTATAGCCCGAGATAGGGCCTTCACCAGCTTGC                                                                          |
| 55 | Rod2_055    | CTGAGAGAGTTGCAGCTTATAAAAGAATACGAAGAACTC                                                                          |
| 56 | Rod2_056    | TCCAGAACAATCAACAGTTGAACATCGGGTAACAATT                                                                            |
| 57 | Rod2_057    | TAGCTTAGCTTATCCGAAACCAATAACTGAACACCCTGAACAAAGTCCCAAC<br>GCT                                                      |
| 58 | Rod2_058    | AAGAACGCGAGAAAAGCATGTAGGTATTCTAAACGAGCG                                                                          |
| 59 | Rod2_059    | AGAACCCTGTCACGTTTTTATCCTGAATCTTAAGAGGGTA                                                                         |
| 60 | Rod2_060    | CGGAAGCATAAAGTGTACAGAGGCAGCCTTTACAACCTTTGATTAATAA<br>TAGGAGCAGCCCTAAAACAATATTAAGGCTCCACGCTGATACGAGC              |
| 61 | Rod2_061    | ACATTCAACAGATGAACGTAATGCCTAAAGACTTTTTCATCACACAAC                                                                 |
| 62 | Rod2_062    | TTTGAGGACACTACGAAGGCACCAATCCCCGATACATAAATGCTGT<br>CTTGCGGGAAGGATAAATGTTTTAGTCTTTACTTTAAACAGTTCAGAATAAAA<br>TA    |
| 63 | Rod2_063    | GGTGTAGATGGGCGCAGCCCCAAAACCTAGCATGTCAATAAAATCAG                                                                  |
| 64 | Rod2_064    | CTAATGCATCAAATGCCCTGACTATTATAGTCTGAACGGT                                                                         |
| 65 | Rod2_065    | AACGGCGGTTGATAATCAGAAAATCGTAACCTCAACGC                                                                           |
| 66 | Rod2_066    | TTATCTAAAATATCTTGTGATGGAACAGTTTAATTAAGCTCAAC                                                                     |
| 67 | Rod2_067    | AATATGCAGGAATACCCAATATAAACTGATACTAACAACAATAACATCACTTG<br>C                                                       |
| 68 | Rod2_068    | AAGCCGGCCTGAGTAGTGGCACAGACATCGCCAAAGAGGA                                                                         |
| 69 | Rod2_069    | CGGTGTACTCCAAAATTTGAATGTGGTTCCCGAGAAAGGAAGGGA                                                                    |
| 70 | Rod2_070    | GAACGTGGGAAATCGGCAAAATCCCAAGCGGTCCAAAAGG                                                                         |
| 71 | Rod2_071    | GTTTGCCCCAGCAGGCGAAAACACTTTCACGTTTCGTGTGTTTCAGCA<br>TTTTAATGAATATACATTAGTTAATTTTCATCTAAGAAAACCTCCCGAGCTACA<br>AT |
| 72 | Rod2_072    | TAGATAAGTCCTGAACTCTGACCTCGTCGCTAACATAAAT                                                                         |
| 73 | Rod2_073    | TTTTCCCTTTAGCGAATAATATCCATTGAGCGCTAATATCAGAGAGATTGCAC<br>CCA                                                     |
| 74 | Rod2_074    | AGGTTTTGCTGTAAATAAATTTAGATTTTCAGGTTTAAC                                                                          |
| 75 | Rod2_075    | CCTTTATTGTGCATCTGATTAGTTGCTATTTAACCCACA                                                                          |
| 76 | Rod2_076    | ATCCGCTCACAATTCGAGGAAGTTGAAAATCAGACCAGAATGCGCG                                                                   |
| 77 | Rod2_077    | AGAAAGCGTACTTCTTGTCTTGATGATACAGGAATAATTTCTCAGAAAATTG<br>TT                                                       |
| 78 | Rod2_078    |                                                                                                                  |
| 79 | Rod2_079    |                                                                                                                  |
| 80 | Rod2_080    |                                                                                                                  |
| 81 | Rod2_081    |                                                                                                                  |

|     |             |                                                              |
|-----|-------------|--------------------------------------------------------------|
| 82  | Rod2_082    | AATCGTTACCTGTGTGACCGCCACCCTCAGAGGTTTAGTAGGTAATAA             |
| 83  | Rod2_083    | CATCAGTTATGGTCTCGTCGCTGGCAGCCTCCTCATAAAC                     |
| 84  | Rod2_084    | AAAGATTGCTGGCTGATCCCTTACACTGCATTAACGGGAACGAGA                |
| 85  | Rod2_085    | TACGGTGTGGGAGAAGCCCATAACCTCACCGGAAACAATCCAAACGCG             |
| 86  | Rod2_086    | ACTTTTGCCTGGAAGTGTCCGTTTTTTTACCATAAATCACATATGTA              |
| 87  | Rod2_087    | CCAATAATATTCATATGGTTTTCAAGCCAGTTTGAGGGGAGCCACGGG             |
| 88  | Rod2_088    | GTTGATTCCCAAAAACGTACAGCGTGCCAAGCTTTCAGAGGTGGAGCC             |
| 89  | Rod2_089    | CGACGACACCTGTAATGACAAAAGGCATTTTCATAAATAAGCACGTAAACA<br>GAAA  |
| 90  | Rod2_090    | TTCATTCCACAGGTAGCCATCTTTGTAAGCGTATAATACATTAACCGTTGTAG<br>CAA |
| 91  | Rod2_091    | GAGATTTAACTAAAGCTTGCTTAAGCCTTAATCAACAAAGAATTGAGTTAAGC        |
| 92  | Rod2_092    | TCAATAGCATACATGGCTTTTTGCGCATAG                               |
| 93  | Rod2_093    | ACCTTCATTTGCGAATAGTGTACTCCGCCACCGGGCGCTAGGGCGCTG             |
| 94  | Rod2_094    | AAAGGAGCCTCAGAACCGCTCCTGTTTGATGGGCTATTA                      |
| 95  | Rod2_095    | TGTGAGTGTTCGTAATGGTTTGAAATACCGGCCTGTTTAATACCAGCGCCA<br>AA    |
| 96  | Rod2_096    | TGATTAGTTAATAGATTAGAGCCGTAAAGAAAAATTTATTAGCGTTTG             |
| 97  | Rod2_097    | GCTAATGCAGAACGCACCGTGTGGGTCATAGCCCCAAC                       |
| 98  | Rod2_098    | ATTATGACGTATCGGCTCACAATCAATAGAAAAAGAGCAA                     |
| 99  | Rod2_099    | ATGGTCATAGCTGTTTACGGCATCTAAAGGAACAAGAGTACCGTTCCA             |
| 100 | Rod2_100    | TATTAGACGCAGTCTCGGGGTCAGAATAGAACTCATTTTTCGTAATC              |
| 101 | Rod2_101    | CGGAACCACGAACTAAGAACCATGGGTAGGTTACCTGCAGCCAGCTCGAA<br>T      |
| 102 | Rod2_102    | AGATGCCGAAGGTTTCTTTGCTCGGGCCAGAGACATTATT                     |
| 103 | Rod2_103    | AAACGATGCATAACGGAACGTGCGGCTGGTAGGATATTCGAGTGAGTGCCT<br>TG    |
| 104 | Rod2_104    | ACGGAACACACATCCTCTGATTGCCGTTCCGGGGCGAAAC                     |
| 105 | Rod2_105    | CCATGTTTACCAGTCGTAAAGTTGCGAACGTTAATAAA                       |
| 106 | Rod2_106    | TTATTTTGTCTAGGAAGATCGCACACGGCCAG                             |
| 107 | Rod2_107    | TGTGAGAGCCCAGTCACGACGTTGTAACG                                |
| 108 | Rod2_108    | TCCAGCCAGCTAAATCGGGAAGTTTTAGCGGGAATCATAGGGTTAGAACC<br>TAC    |
| 109 | Rod2_109    | ATATAACATTTTCATCGGGCGACATCATGTTTACAGAAACAATGAAATAGC          |
| 110 | Rod2_110    | AATAGCTAAATAAGTTTGAGGGAGGTTGTACCAATTCT                       |
| 111 | Rod2_111    | GCAAGTGTCTGTCCATGTTTAACTGAATTTAATCTTGAC                      |
| 112 | Rod2_112    | AGCGGTCACACCGTACTCAGGAGCCACCACCGGAACAAC                      |
| 113 | Rod2_113    | CAGGGATAGCAAGCCCCCGAATAGTAACAGGTGAGGCC                       |
| 114 | Rod2_114    | AGGTGTATCGCTGCGCGTAACCACCACACCTATAATCA                       |
| 115 | Rod2_115    | TCATAATCAATTATTTGGCGTTAATAAGAATATAACAATCAACCGA               |
| 116 | Rod2_116    | AGAGCCACTGGAAAGCTTTACAAAACCGAGTAAAAGAGT                      |
| 117 | Rod2_117    | CACGCAAATTTGAGGATTTAGAAGCATATCAAAAATCACTAGCGCGT              |
| 118 | Rod2_118    | TGTCCAGACGACGACAAAACACCTCAGACTG                              |
| 119 | Rod2_119    | AGCATAAAGCTTTCCGCGCAAAGACACCACGGTCTTACC                      |
| 120 | Rod2_120    | ATCCCCGGGTACCGAGCGGTGCCG                                     |
| 121 | Rod2_121    | TATTAATATAAATCCTAACAGTAAACAACCTACCCATGTAGTTGAGG              |
| 122 | Rod2_122    | GTGCCCCGTCACTGTTGCCCTGCCGGACTTGAATCTACG                      |
| 123 | Rod2_123_3L | GACGTTGGTAACAAAGTGAGCCGGCTGCATCA                             |
| 124 | Rod2_124    | GACGATCCCTCCTCACACCGTAACACTGAGTTAAGTGCCGCCTGCCTACGC<br>CAGAA |
| 125 | Rod2_125    | TAGAACGTCTTTAGTGATGAAGGCCGGAATT                              |
| 126 | Rod2_126_3L | AAAAGAAAGCACCGCTTCTGGTGAGGGTTTTATAGACTT                      |

|     |               |                                                                 |
|-----|---------------|-----------------------------------------------------------------|
| 127 | Rod2_127      | TCTCCGTGAAGCCGCACAGGCCGGCCAGCGTGGTGCTGGTCTTGCGGTACT<br>GTCAT    |
| 128 | Rod2_128      | CTCAAGGCGATTAAGTTGGGTAACGCCCCGAAAC                              |
| 129 | Rod2_129      | CAATTCGACAACCTCGACTTCTGACCGCCTCCAGAATCATAGTTTGAAGCCT<br>CAG     |
| 130 | Rod2_130      | CAAATTATAAAGGTGCCGTAATCTATCATATTGATTGTTTGGATTAT                 |
| 131 | Rod2_131      | AGTAGATTAGTTTGCCAAATATTGAGTAATTCGAAGCCCTTTTAAAGA                |
| 132 | Rod2_132      | AAAGTAAGCAACATATTTATTCATAGCAATAACCATTAGA                        |
| 133 | Rod2_133      | TACATTTCCAGTCAGCGCCACCCACAAACAACCTTTGCCTCCTGAGAAGTG<br>TTTT     |
| 134 | Rod2_134      | TGCCCGTATCATTAAAATCAACGGAAGAAA                                  |
| 135 | Rod2_135      | TTTCAGCGATTACCCAAGCCAGAA                                        |
| 136 | Rod2_136      | GCCGCGCTGTTGATATAAGTATAGAATAGGATTCAACAG                         |
| 137 | Rod2_137      | ATTTTGCTTAATGCCCTCGAGAGGTAATGCGCCGCTACAG                        |
| 138 | Rod2_138      | CACCGGAAATAATGAAATTAAGTAAAAAGCAAGGTAACGGAAA                     |
| 139 | Rod2_139      | TATAAAGTACCGACAACCTTTAGAGTAGCGACTCAGAGC                         |
| 140 | Rod2_140      | AGAATTAGCAGGCCAAAACATACATAAAGGTGGCAGATAGC                       |
| 141 | Rod2_141_3L   | CTTCGCGTCCGTGAGCAGCGCAGTGTAC                                    |
| 142 | Rod2_142      | TAAAAGTTGTCAGACGCCTATTAAGTAAATAGTACAAAGCCTGTT                   |
| 143 | Rod2_143      | TCAGAGCCGATTTAATGCCCTGACGCACTCAGCGCCTGTGCACTCTGGCA<br>CGCGT     |
| 144 | Rod2_144      | TGCATCCGCCGGGCGCGGTGGTCAGCTCATTATA                              |
| 145 | Rod2_145      | CGACATAACAAGAATGCCAACGGGGCGCTTTCGAGAAAC                         |
| 146 | Rod2_146_3L   | GAAGTGGCAGCAACCGAAAAATCCCGTAAAAAGTGAAGGGATAG                    |
| 147 | Rod2_147      | TCACGGAAAAAGAGACGTGTACATGCTATATTCCTTATGC                        |
| 148 | Rod2_148      | AGAAAATGCGCCATTCCGCAATTCGTGCTGC                                 |
| 149 | Rod2_149      | AGTAGCATAGCGGATCTACGCCAGCTGGCGAAAGGGGGAT                        |
| 150 | Rod2_150      | AGGCTGCGAATAAATCCCATTTGGAACGTCACATAAAGCCATCAGATGATGG<br>CAA     |
| 151 | Rod2_151      | CGAACGTTATTAATTTTTTCATCAAGCCACCCACCATCGATCAATAACAAGGCA<br>A     |
| 152 | Rod2_152      | GCAAATGGTAGCAGCAAATTATCATAAGAGAACGAACAAAGTTACCAG                |
| 153 | Rod2_153      | AAGGAAAGCAAACGTGACTTGAGATACAGGCCTGTTTA                          |
| 154 | Rod2_154      | GGCGCGTAAACGGTATTTCCGAAATTGGCCTTAAGGCT                          |
| 155 | Rod2_155      | TGTATGGGTCAGTGAATGATATTC                                        |
| 156 | Rod2_156      | CTATGGTCAGTACCAGGCGGATTCGTCACCGAATTTTC                          |
| 157 | Rod2_157      | CAGACGTTTTCTGAAAGTTTTGCTTGCTTTGACGAGCAGC                        |
| 158 | Rod2_158      | CTACAACGCCTGTAGTTAGCGGGCATGAAAGCCGATTAA                         |
| 159 | Rod2_159      | TCAGAACCTATAATCCGCGTTATACAAATTCGCCAGTAACCGTCACC                 |
| 160 | Rod2_160      | ACCACCCTTGAGGCAGTGAGTAACAGGGATTTTAGACAGG                        |
| 161 | Rod2_161      | GCAGAGGCATTTTCGATTACCAGTCAATGAA                                 |
| 162 | Rod2_162      | TAACATCCCAACTGTATTACGCAATGTTACCGAGGAA                           |
| 163 | Rod2_163_4T   | ttatCCGGGGGTTTCTGCCATGGTGCTCGTCTTTCACCAGAACAGGAGGT              |
| 164 | Rod2_164_4T   | ACCACCACTCAACTTTAATTGGGCTCCAGCATAATGCGGGCGGGCCGttt              |
| 165 | Rod2_165_3T2T | tttTGATTAAAAATCACCTAATAGTGCTGAAAATTTGCCGCCGCCATCCCACG<br>CAACTt |
| 166 | Rod2_166      | AATCATTGTCCGGTGGTAGCAGTTGGGCGGTTGCAGAAAC                        |
| 167 | Rod2_167_4T   | TTCGCTATAAACTTAAATTTCTttt                                       |
| 168 | Rod2_168_4T   | CAACATGTAGCCAGCAGACTCCTTTGGGAAGGGCGATCGGttt                     |
| 169 | Rod2_169_4T   | TTCATTTGAGGCCGGAGAATTAGAATTTAGACGCAATAATAACGGAATACCC<br>Atttt   |
| 170 | Rod2_170      | ATTATCATTTTGCGGCATCATATCCACCAGACATTAGCAGGGCGCGA                 |
| 171 | Rod2_171      | AGTTTTGTGCGGCCAGCAGCGGGGTCATTGCACAGCACCGTGAATTA                 |
| 172 | Rod2_172      | TATAACGTACAGGAGGTATTAAGAGCATTGACGAGTAGTA                        |



|     |               |                                                                 |
|-----|---------------|-----------------------------------------------------------------|
| 173 | Rod2_173_4T   | ttttGGAGCTAAGCTTTCCTAAGAGAAGGATTAGGACATTCCAC                    |
| 174 | Rod2_174_3TT  | ttttAGGAGCGGAATTATAACAAAGACGCCGCCAGGCTGAGACGATCTAAAGA<br>CAGCCt |
| 175 | Rod2_175      | CAGAGCCGTCCTGATTAACGCTCAACAGTAGG                                |
| 176 | Rod2_176_4T_F | ttttCCATATTTAACAACGCGCTTAATTACCATTAC                            |
| 177 | Rod2_177_4T2  | ttttATATATTCATTAATGAATCGGttttCCAACGCGCGGGG                      |
| 178 | Rod2_178_4T3  | ttttGCGTCAATTCtttttttTTCTAGCTGAAttt                             |
| 179 | Rod2_179_4T2  | TCAAAAATTGGCCTTCTTCAACCGttttAGCAAGCCTTTtttt                     |
| 180 | Rod2_180_4T3  | ttttTCACATAACCGttttTGAAATGGAAACCGTCTATCAtttt                    |
| 181 | Rod2_181_4T2  | CGATTTTTTGTttttAACGTCAAAAATGCGAGAACAAttt                        |
| 182 | Rod2_182_4T2  | CAATCGTCtttttttGGGCGATGGCCA                                     |

**Supplementary Table 3**

modification staples for Rod1 and Rod2

("F" in the staple name indicates the place of Fluorophore (Cy5), and "5L/3L" indicates the place of BG at 5'- and 3'-end)

| #    | Mod | Pos | Name                 | Sequence ("*" denotes the modification such as NH2 or C6dT)                                                                                                 |
|------|-----|-----|----------------------|-------------------------------------------------------------------------------------------------------------------------------------------------------------|
| Rod1 | 5L  |     | Rod_012_5NC12        | *ttttttTCGCATTAAATTTTTGTTGTACCAAAAACATACATCCAATAAAT<br>CATAC                                                                                                |
| Rod1 | F   |     | Rod_174_Cy5          | Cy5-ttttttTTAGTCTTTAATGCGCTATTTTTGGGGTCATAAACAACCTTTC                                                                                                       |
| Rod2 | 5L  | 1   | Rod2_025_5L-NdT3_T30 | *T*T*ttttttttttttttttttttttttttttttGCAGCGAATCACATTAGGCAACAGCTGATTG<br>CTTGAGTGAGAGATAG                                                                      |
| Rod2 | 5L  | 2   | Rod2_029_5L-NdT3_T30 | *T*T*ttttttttttttttttttttttttttttttGGTCATTGAGAGGAAGTCATTTTTGCGGATG<br>G                                                                                     |
| Rod2 | 3L  | 3   | Rod2_040_3L-NdT3_T30 | AATGAGTGAGCTAACAGACAGCATCGGAttttttttttttttttttttttttttttttt*T*T*<br>GGAATCGTGCATCAAAAAGATTACCTGAGAGTCTGtttttttttttttttttttttttttttttt                       |
| Rod2 | 3L  | 4   | Rod2_045_3L-NdT3_T30 | t*T*T*<br>GACGTTGGTAACAAAGTGAGCCGGCTGCATCAtttttttttttttttttttttttttttttt*T*<br>T*                                                                           |
| Rod2 | 3L  | 5   | Rod2_123_3L-NdT3_T30 | AAAAGAAAGCACCGCTTCTGGTGAGGGTTTTATAGACTTtttttttttttttttttttttttttttttt<br>tttttttttt*T*T*                                                                    |
| Rod2 | 3L  | 6   | Rod2_126_3L-NdT3_T30 | CTTCGCGTCCGTGAGCAGCGCAGTGTACtttttttttttttttttttttttttttttt*T*T*<br>GAACTGGCAGCAACCGAAAAATCCCGTAAAAAGTGAAGGGATAGttttt<br>tttttttttttttttttttttttttttttt*T*T* |
| Rod2 | 3L  | 7   | Rod2_141_3L-NdT3_T30 | tttttttttttttttttttttttttttttt*T*T*                                                                                                                         |
| Rod2 | 3L  | 8   | Rod2_146_3L-NdT3_T30 | *ttttCCATATTTAACAACGCGCTTAATTACCATTAC                                                                                                                       |
| Rod2 | F   |     | Rod2_176_4T_Cy5      |                                                                                                                                                             |
